# Supplementary material for: Are Faculty Changing? How Reform Frameworks, Sampling Intensities, and Instrument Measures Impact Inferences about Student-Centered Teaching Practices
Source: Atypon-hosted journal article supplement (doi:10.1187/cbe.20-11-0259), 2021-07-26
Supplement: combinedsupmats.pdf [file combinedsupmats.pdf]

# Supplemental Material

CBE—Life Sciences Education

Sbeglia *et al.*

**Supplemental Table 1.** The 25 observational codes and behaviors of the COPUS.

|            | Code                                     | Behavioral Code Description                                                   |
|------------|------------------------------------------|-------------------------------------------------------------------------------|
| Instructor | 1o1*                                     | One-on-one extended discussion with one or a few individuals                  |
|            | Adm                                      | Administration (assign homework, return tests, etc.).                         |
|            | CQ*                                      | Asking a clicker question                                                     |
|            | D/V                                      | Showing or conducting a demo, experiment, simulation or video.                |
|            | Fup                                      | Follow-up/feedback on clicker question or activity to entire class.           |
|            | LAnQ                                     | Listening to and answering student questions with entire class listening.     |
|            | Lec*                                     | Lecturing (presenting content, presenting a problem solution, etc.)           |
|            | LO                                       | Other - explain in comments                                                   |
|            | LW                                       | Waiting (not interacting or observing/listening to student activity in class) |
|            | MG                                       | Moving through class guiding ongoing student work                             |
|            | PQ*                                      | Posing a non-clicker question to students (non-rhetorical).                   |
|            | RtW                                      | Real-time writing on board, doc. projector, etc.                              |
|            | Student                                  | CG*                                                                           |
| Ind        |                                          | Individual thinking/problem solving                                           |
| L          |                                          | Listening to instructor/taking notes, etc.                                    |
| OG*        |                                          | Other assigned group activity, such as responding to instructor question.     |
| Prd        |                                          | Making a prediction about the outcome of a demo or experiment.                |
| SAnQ*      |                                          | Student answering a question posed by the instructor                          |
| SO         |                                          | Other - explain in comments.                                                  |
| SP         |                                          | Presentation by student(s)                                                    |
| SQ         |                                          | Student asks question.                                                        |
| SW         |                                          | Waiting (instructor late, working on fixing AV problems etc.)                 |
| TQ         |                                          | Test or quiz                                                                  |
| WC         |                                          | Engaged in whole class discussion                                             |
| WG*        | Working in groups on worksheet activity. |                                                                               |

\*Behaviors used by the COPUSAnalyzer

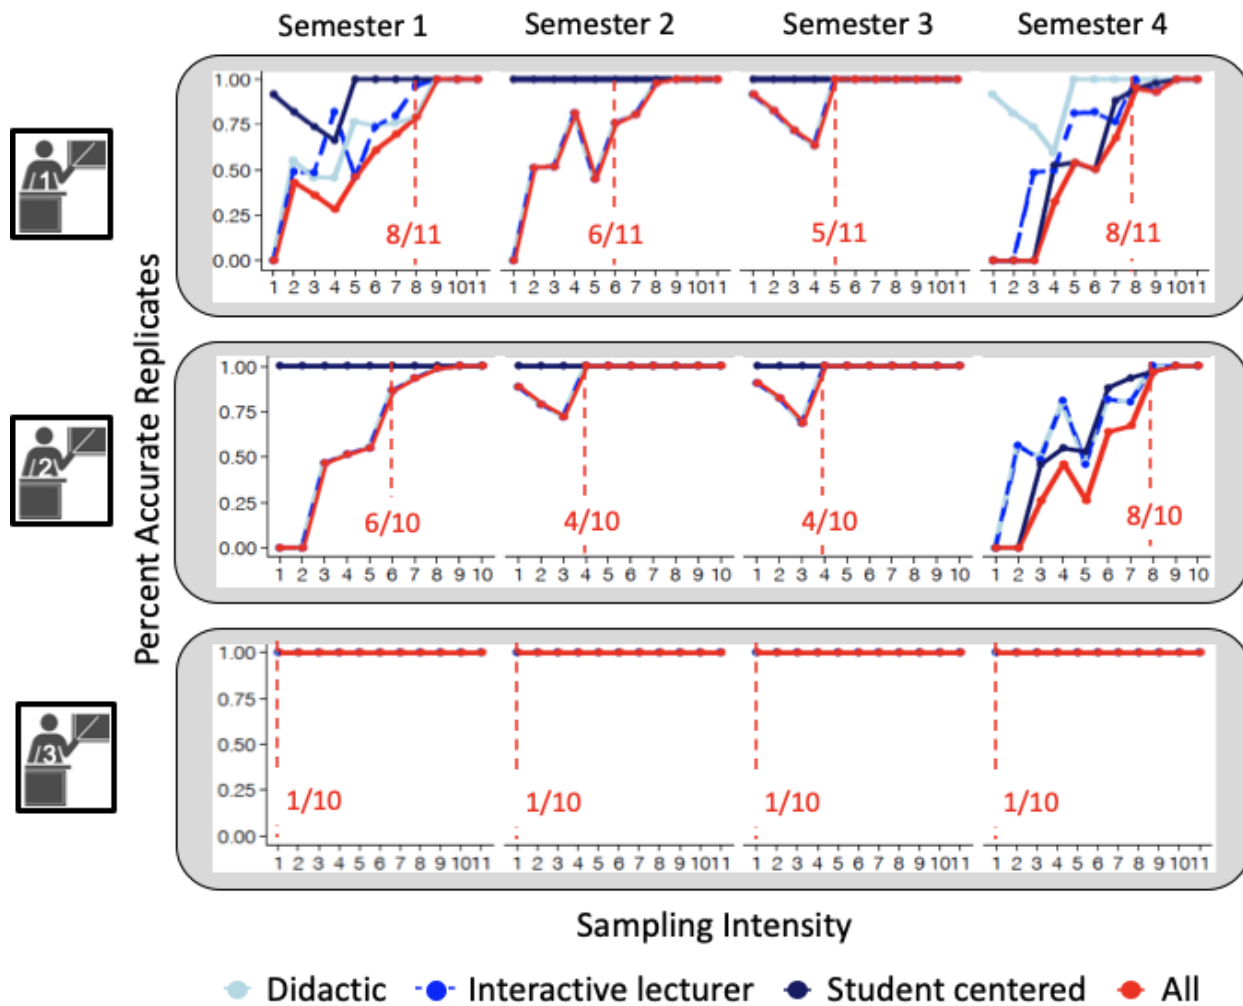

**Supplemental Figure 1.** Simulation results for each instructor and semester in our dataset using a 15% threshold for accurate estimation. The sampling intensity required to attain a  $\geq 75\%$  probability of accurately estimating all instructional styles in each semester is indicated by the vertical red dashed line. Sampling intensities with accuracy probabilities above this 75% threshold can be considered capable of accurate and precise measurement for the instructors and courses in this sample. Note that these results are based on 128 observations (full classes) gathered for this study. At this threshold, the number of classes needed to accurately estimate the proportion of instructional styles within these courses ranged from 1-8.

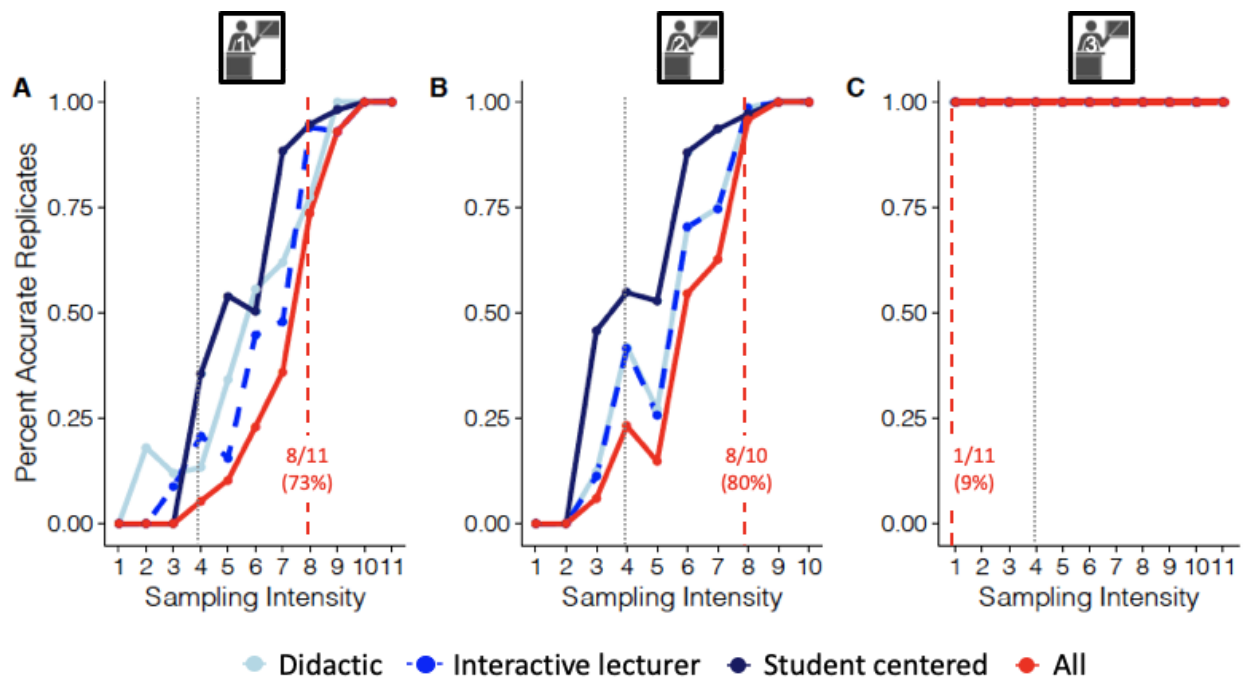

**Supplemental Figure 2.** Simulation results through time for instructors 1 (A), 2 (B), and 3 (C) using a 15% threshold of accurate estimation. The sampling intensity required to attain a  $\geq 75\%$  probability of accurately estimating all instructional styles in every semester sampled for each instructor is indicated by the red dashed line and text. [Sampling intensities with accuracy probabilities above this 75% threshold can be considered capable of accurate and precise measurement for the instructors and courses in this sample.](#) For Instructor 3, whose classes were consistently didactic, a sampling intensity of one class was sufficient to accurately measure change (or lack thereof) in the classroom learning environment through time. Conversely, the courses for Instructors 1 and 2 were characterized by two instructional styles some semesters and three in others, and the proportions shifted through time. Given the inconsistency of their styles through time, higher sampling intensities (i.e., 8 classes) were required to measure change [in these instructors](#) through time with a high probability.

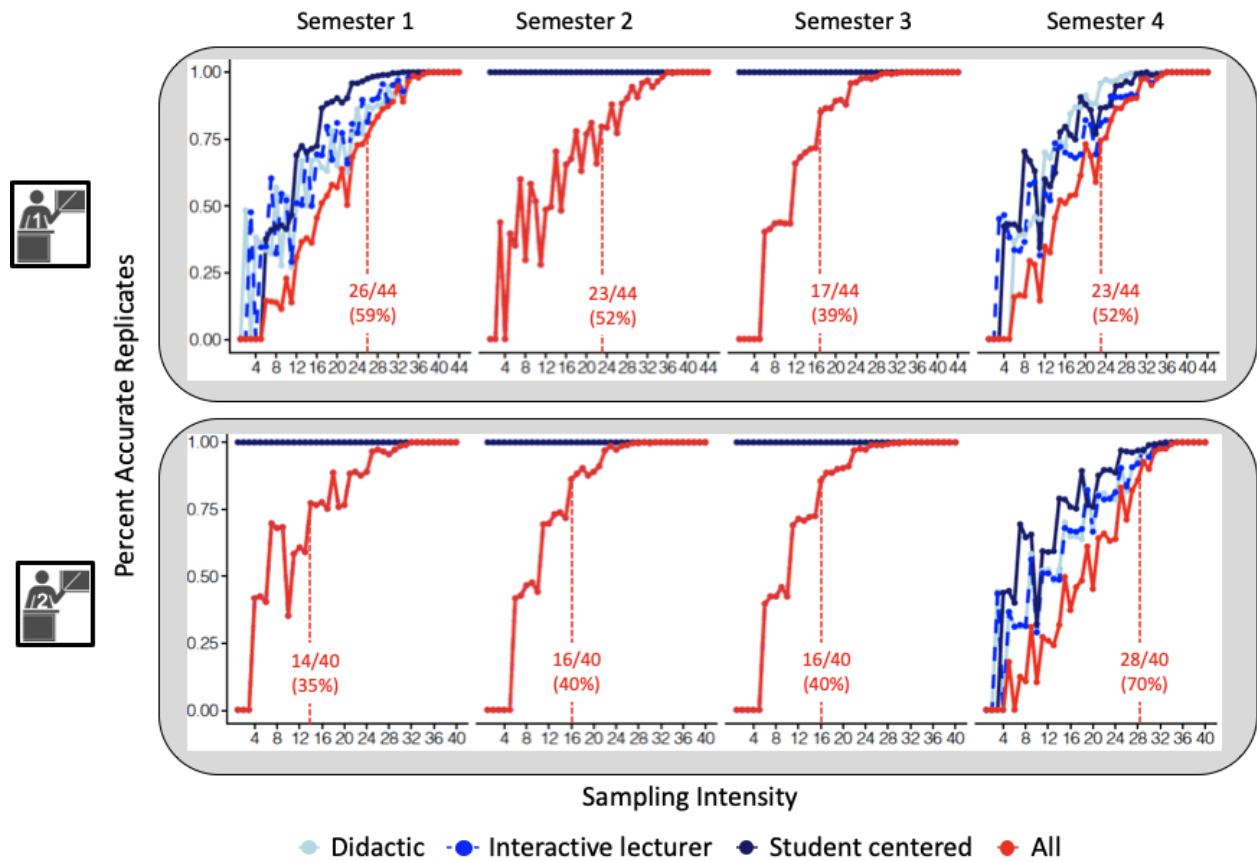

**Supplemental Figure 3.** Simulation results for each instructor and semester in our dataset using a 9% threshold for accurate estimation. The data were copied four times to simulate a course with 40-44 classes. Instructor 3 was not included in this analysis because they showed no variation in their instructional styles. The sampling intensity required to attain a  $\geq 75\%$  probability of accurately estimating all instructional styles in each semester is indicated by the vertical red dashed line. Sampling intensities with accuracy probabilities above this 75% threshold can be considered capable of accurate and precise measurement for the instructors and courses in this sample. Note that these results are based on 128 observations (full classes) gathered for this study. At this threshold, the number of classes needed to accurately estimate the proportion of instructional styles within these courses ranged from 14-28 (35%-70%).

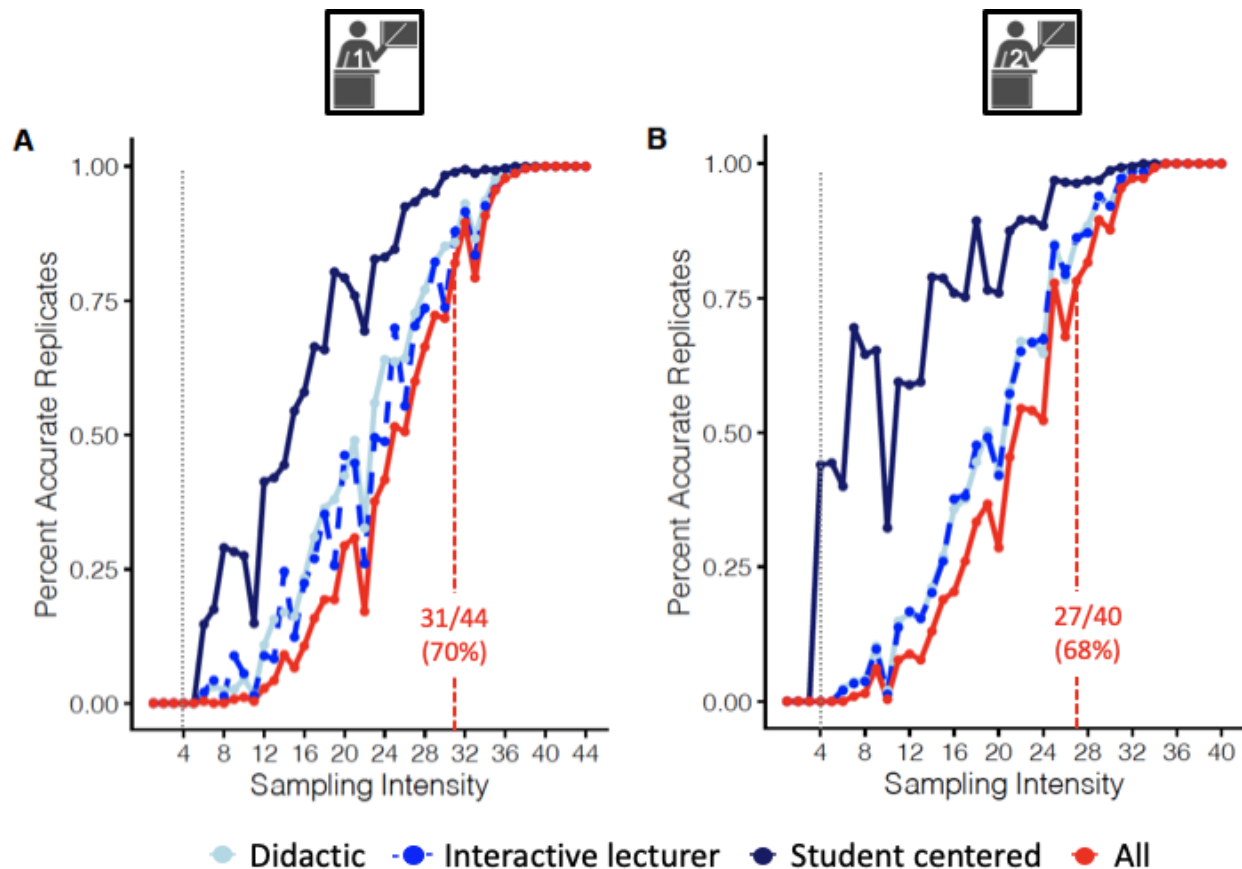

**Supplemental Figure 4.** Simulation results through time for instructors 1 (A) and 2 (B) using a 9% threshold of accurate estimation. The data were copied four times to simulate a course with 40-44 classes. Instructor 3 was not included in this analysis because they showed no variation in their instructional styles. The sampling intensity required to attain a  $\geq 75\%$  probability of accurately estimating all instructional styles in every semester sampled for each instructor is indicated by the red dashed line and text. Sampling intensities with accuracy probabilities above this 75% threshold can be considered capable of accurate and precise measurement for the instructors and courses in this sample. For Instructor 3, whose classes were consistently didactic, a sampling intensity of one class was sufficient to accurately measure change (or lack thereof) in the classroom learning environment through time. Conversely, the courses for Instructors 1 and 2 were characterized by two instructional styles some semesters and three in others, and the proportions shifted through time. Given the inconsistency of their styles through time, higher sampling intensities (i.e., eight classes) were required to measure change in these instructors through time with a high probability.
